# Supplementary material for: A nanoplatform based on mesoporous silica-coated gold nanorods for cancer triplex therapy
Source: Royal Society of Chemistry journal article supplement (doi:10.1039/d0tb01707h), 2020-01-01
Supplement: d0tb01707h1.pdf [file d0tb01707h1.pdf]

## **Supplementary Information**

### **A nanoplatform based on mesoporous silica-coated gold nanorods for cancer triplex therapy**

Genhua Liu<sup>1</sup>, Huining Liang<sup>1</sup>, Ye He, Lu Lu, Lu Wang, Peng Liu\*, Kaiyong Cai\*

Key Laboratory of Biorheological Science and Technology of Ministry of Education,  
College of Bioengineering, Chongqing University, Chongqing 400044, China

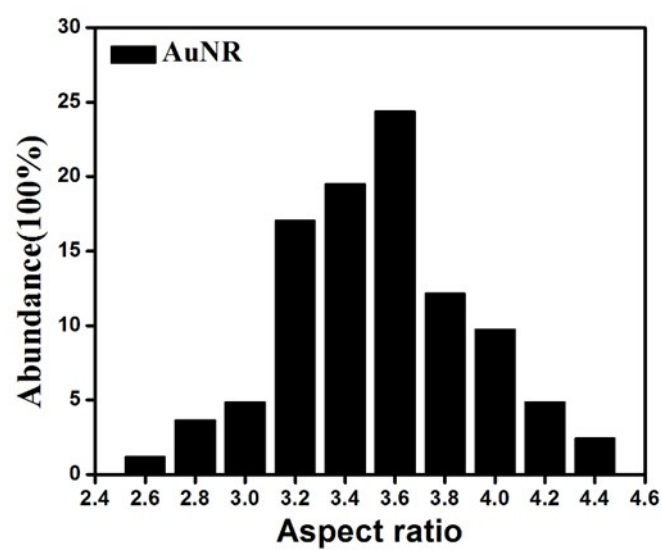

**Figure S1.** Aspect ratio distribution histogram of AuNR

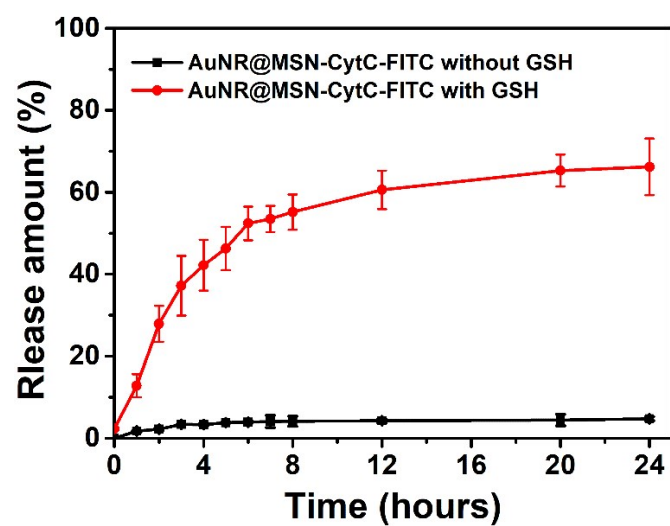

**Figure S2.** Redox-responsive release profiles of CytC from AuNR@MSN-CytC-FITC

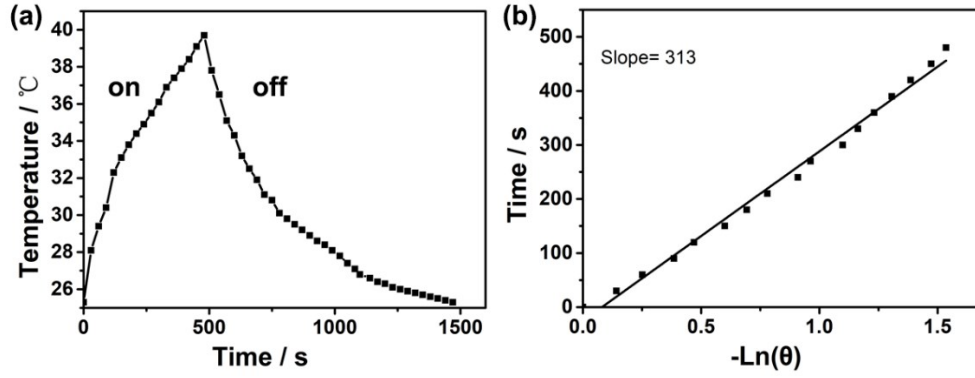

**Figure S3.** (a) The temperature response of AuNR@MSN-CytC@DOX (70  $\mu\text{g mL}^{-1}$ ) during one on/off cycle of the 808 nm NIR laser (1 W  $\text{cm}^{-2}$ ). (b) Plot of cooling time versus negative natural logarithm of the temperature driving force ( $\Delta T / \Delta T_{\text{max}}$ ) in the cooling stage. The thermal time constant for heat transfer from the system is determined to be  $\tau_s = 313$  s.

The photothermal conversion efficiency ( $\eta$ ) of AuNR@MSN-CytC@DOX was determined to be 16.4% according to the following equation used in the reported studies:<sup>1</sup>

$$\eta = \frac{hS(T_{\text{max}} - T_{\text{surr}}) - Q_0}{I(1 - 10^{-A_{808}})} \quad (1)$$

$$\tau_s = \frac{m_d C_d}{hS} \quad (2)$$

$$Q_0 = hS(T_{\text{max, water}} - T_{\text{surr}}) \quad (3)$$

The value of  $\tau_s$  (313) can be calculated from the curve in Figure,  $m_d$  is the mass of the nanoparticle solution (1g), and  $C_d$  is the heat capacity of water (4.2 J  $\text{g}^{-1} \text{K}^{-1}$ ), the value of  $hS$  is calculated by equation (2). Then,  $Q_0$  is calculated via equation (3), Where  $h$  is the heat transfer coefficient,  $S$  is the sample container surface area,  $T_{\text{max, water}}$  represent the steady state maximum temperature of water (30.2 °C) and  $T_{\text{surr}}$  is the

ambient room temperature (25.2 °C), respectively. Then the photothermal conversion efficiency ( $\eta$ ) can be calculated based on equation (1).  $T_{max}$  is the steady state maximum temperature of AuNR@MSN-CytC@DOX (39.7 °C).  $I$  is the laser power, and  $A_{808}$  is the absorbance of AuNR@MSN-CytC@DOX at 808 nm (0.58).

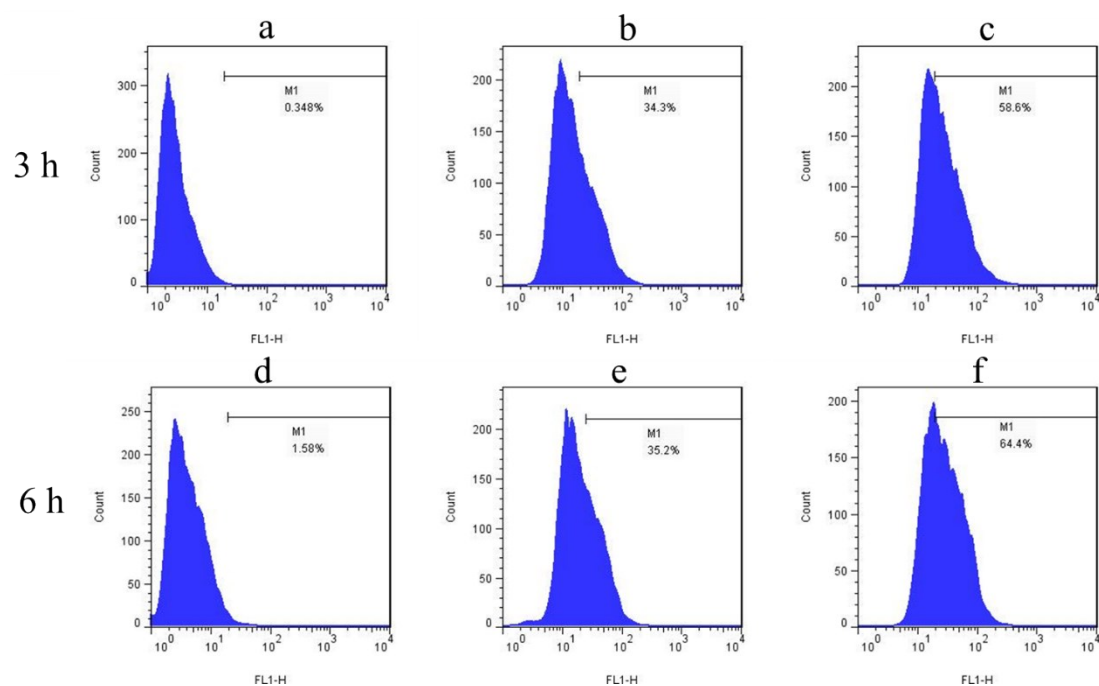

**Figure S4.** Representative analysis photos of FACS with free FITC (a, d), AuNR@MSNs@FITC (b, e) and AuNR@MSNs-CytC@FITC (c, f).

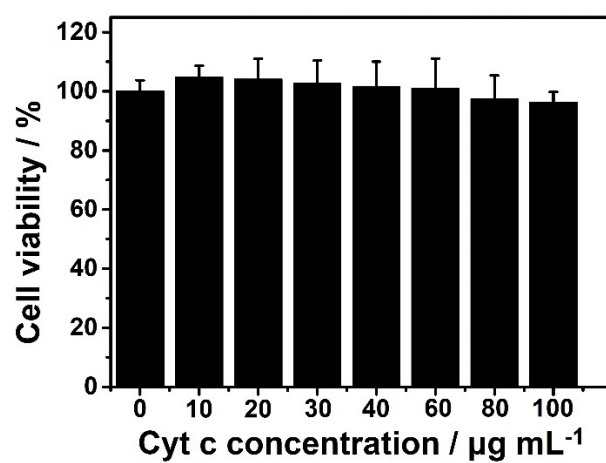

**Figure S5.** Evaluation of the cytotoxicity for MCF-7 cells treated with free CytC at varying concentrations for 24 h.

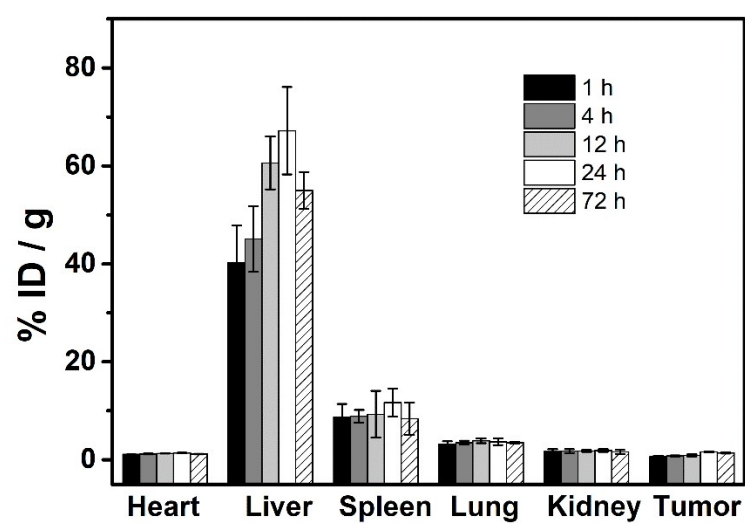

**Figure S6.** Time-dependent biodistribution of AuNR@MSN-CytC@DOX after intravenous injection by ICP assay.



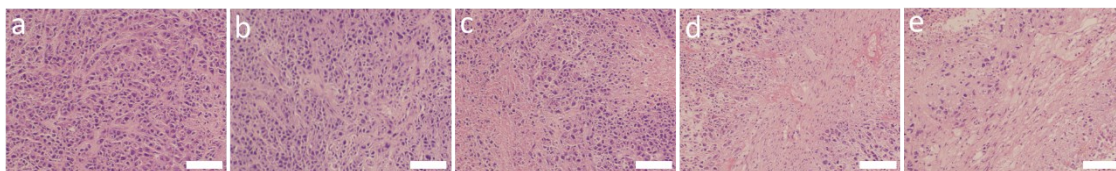

**Figure S7.** Histologic assessments of tumor tissues by Hematoxylin and eosin (HE) staining (pink: cytoplasm and Extracellular matrix, blue purple: nuclei): saline (a, control group), DOX (b), AuNR@MSN-CytC + Irradiation (c), AuNR@MSN-CytC@DOX (d) and AuNR@MSN-CytC@DOX + Irradiation (e) respectively. The scale bar is 100  $\mu\text{m}$ .

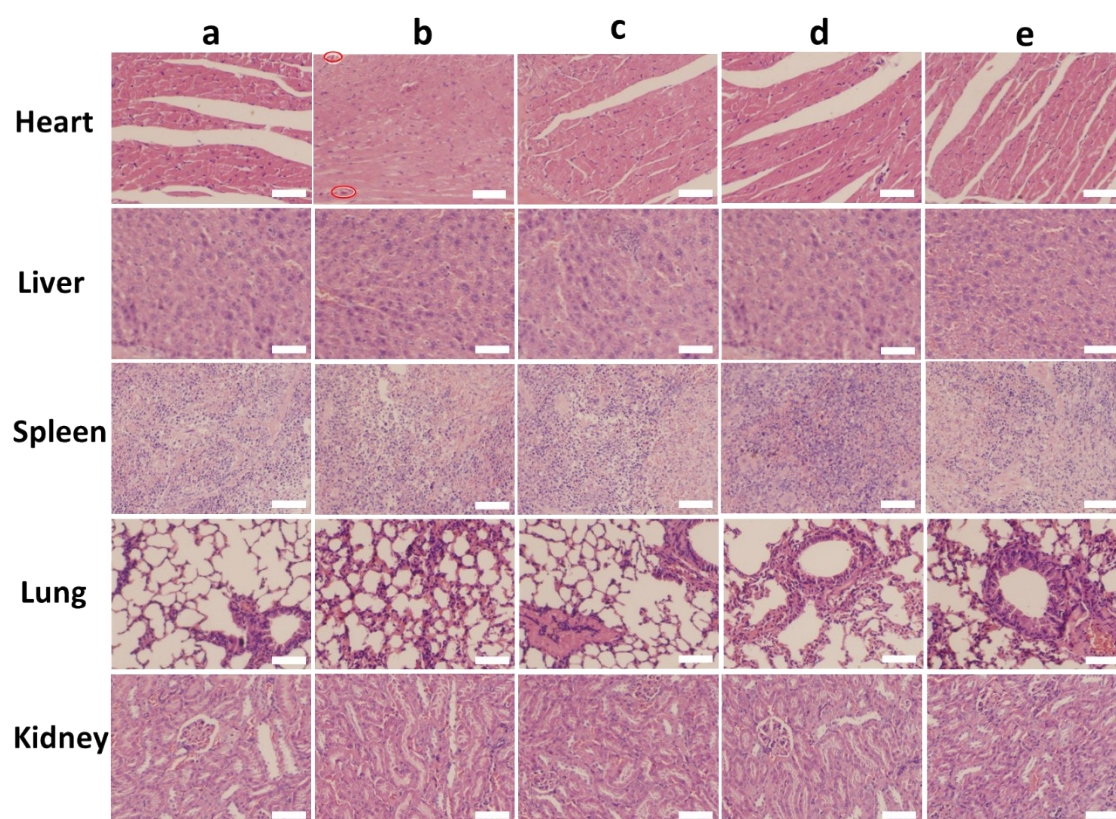

**Figure S8.** HE staining assessments of main organs in tumor bearing nude mice treated with saline (a, control group), DOX (b), AuNR@MSN-CytC + Irradiation (c), AuNR@MSN-CytC@DOX (d) and AuNR@MSN-CytC@DOX + Irradiation (e). The scale bar is 50  $\mu\text{m}$ .

**Table 1.** The zeta-potentials of AuNR@MSN before and after each step of modification.

| Materials      | $\zeta$ -potential (mV) |
|----------------|-------------------------|
| AuNR@MSN       | -11.1                   |
| AuNR@MSN-HS    | -20.5                   |
| AuNR@MSN-S-S   | 10.6                    |
| AuNR@MSN-Cyt c | 26.3                    |

1. Y. X. Xing, J. X. Zhang, F. Chen, J. J. Liu and K. Y. Cai, *Nanoscale*, 2017, **9**, 8781-8790.
